# Supplementary material
Source: HighWire-hosted journal article supplement (https://cmajopen-stage.highwire.org/highwire/filestream/85602/field_highwire_adjunct_files/6/2020-0222-7-at.pdf)
Supplement: 2020-0222-7-at.pdf [file 2020-0222-7-at.pdf]

## CFN –Physical activity interventions

Effect on Mobility outcomes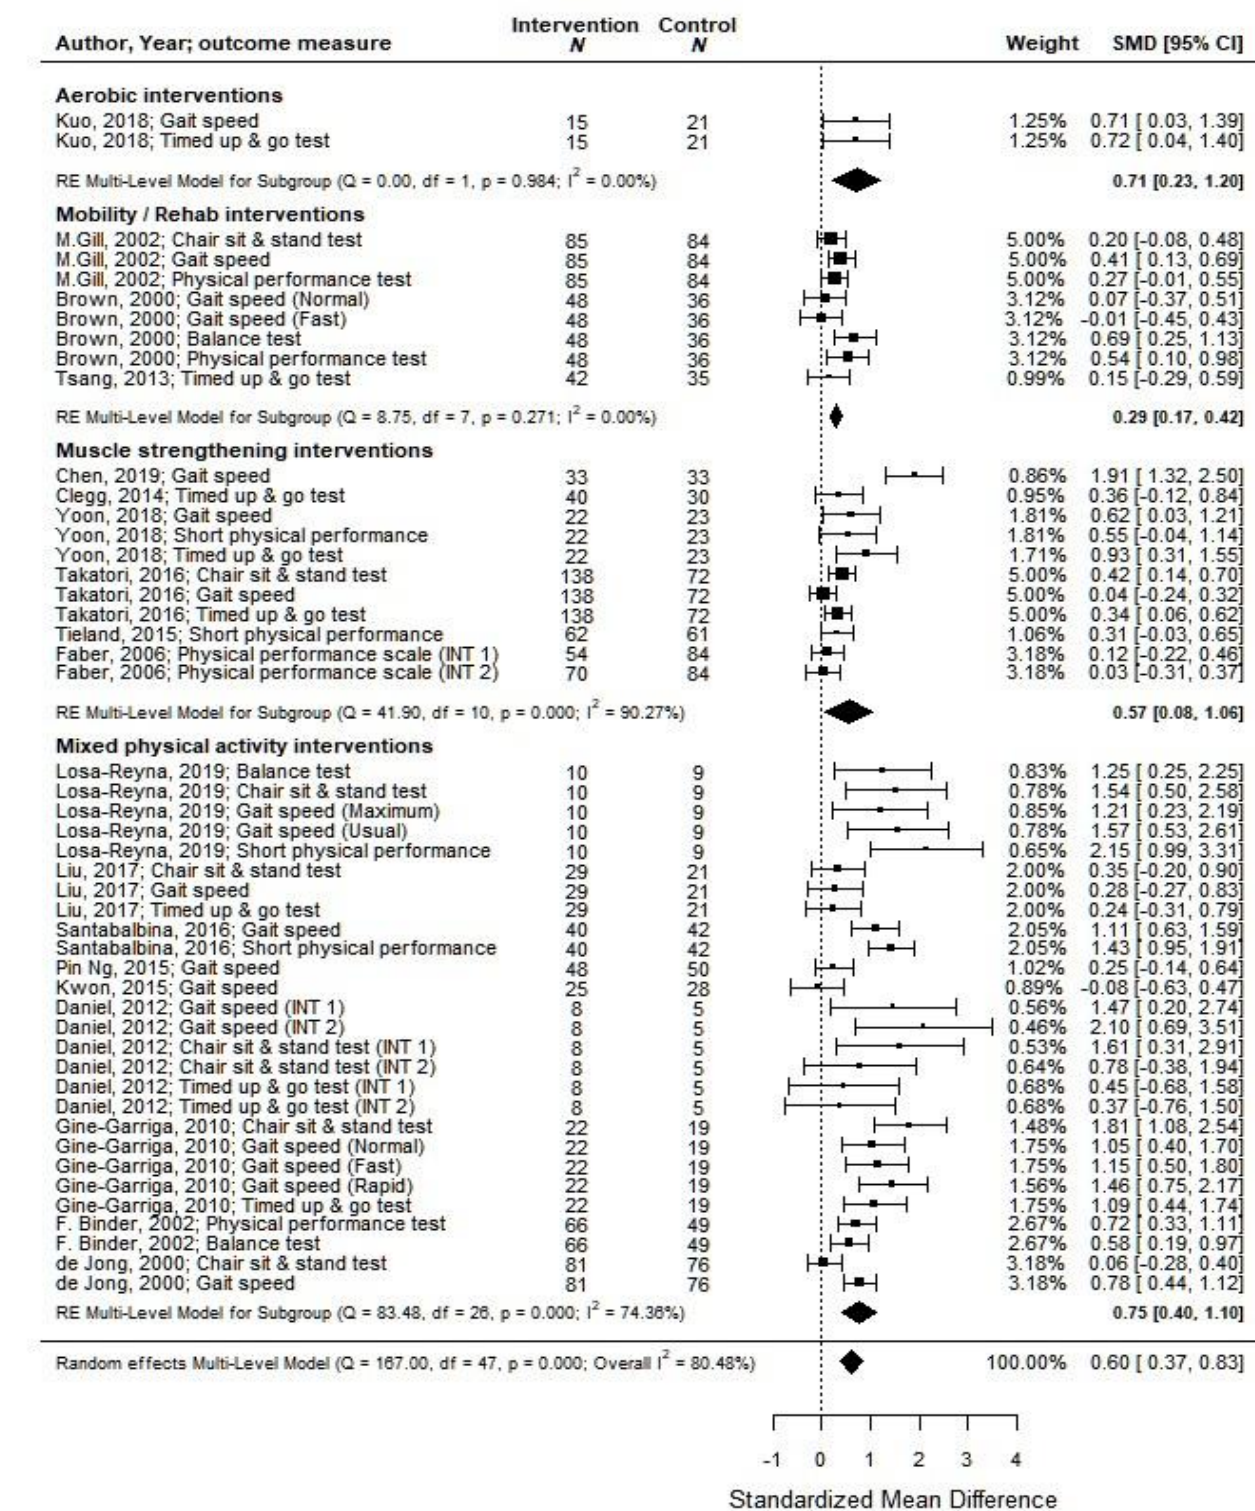

## Effect on Activities of daily living

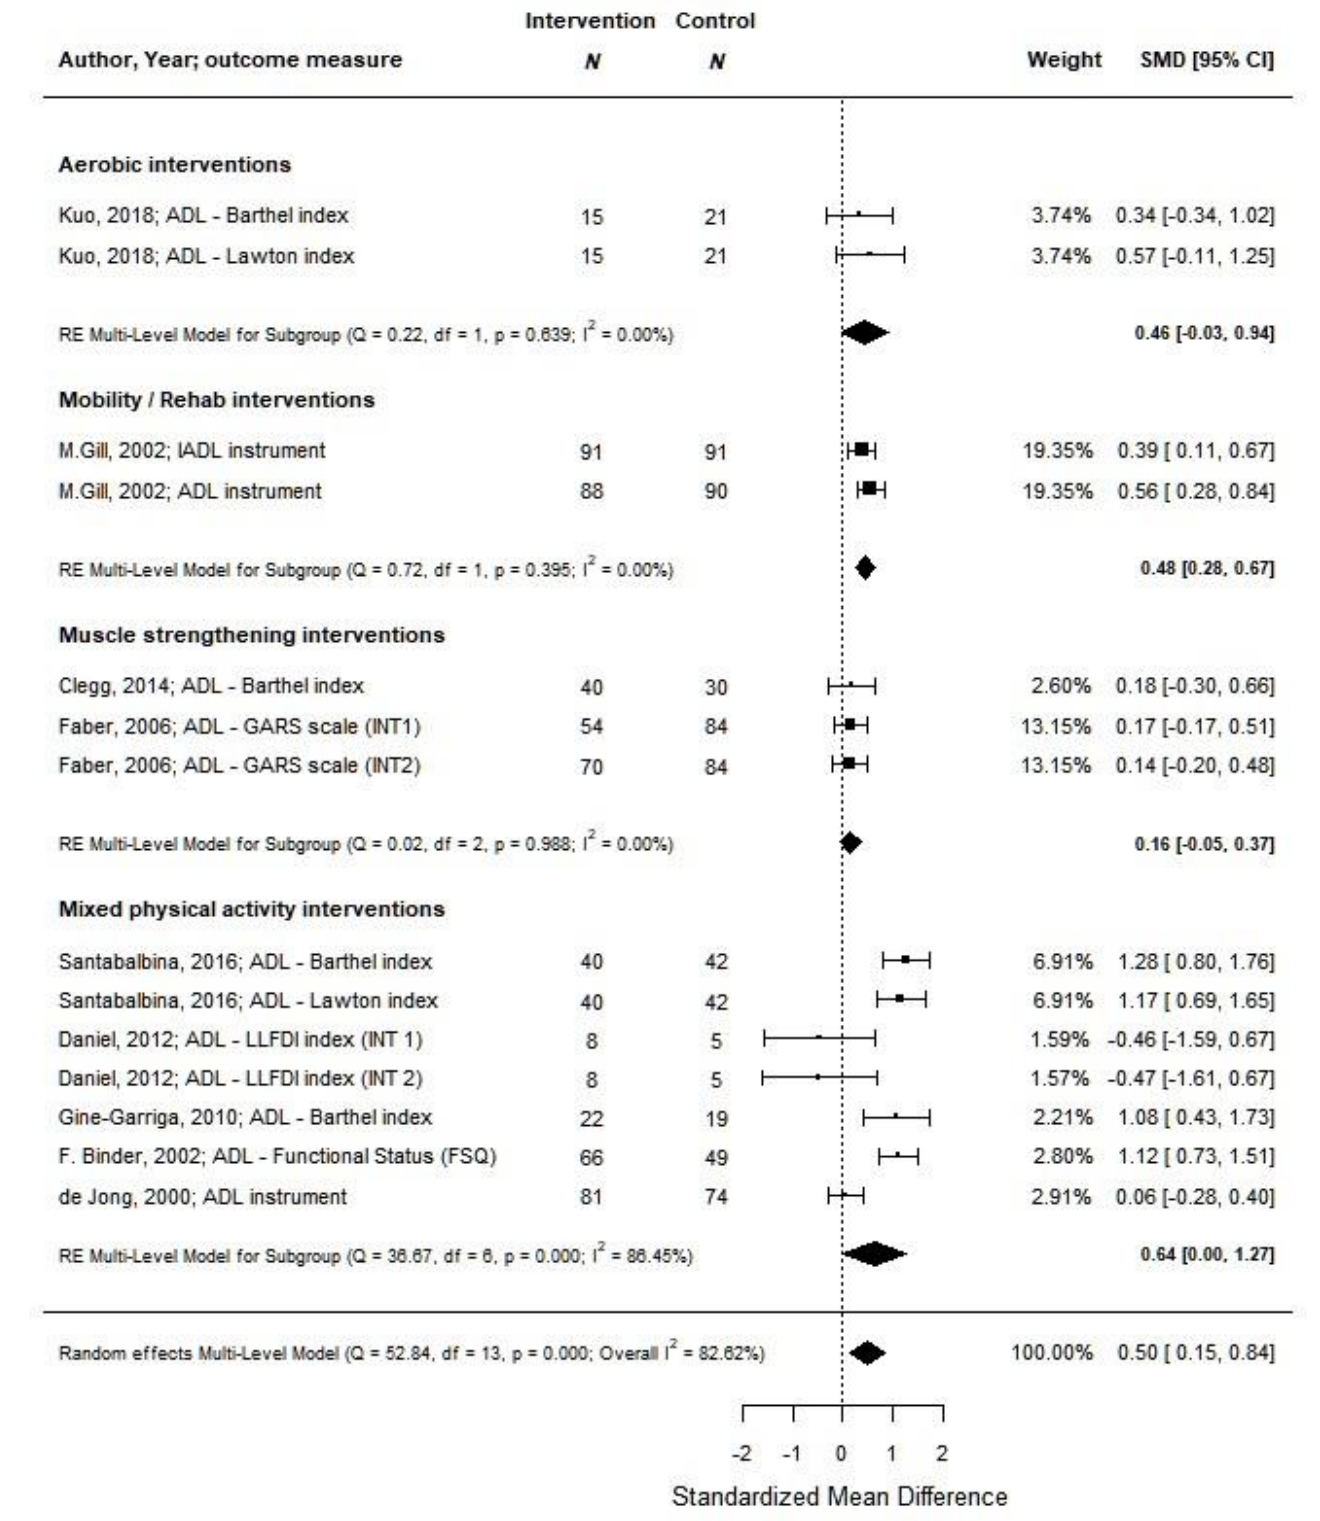



## Effect on Cognitive function

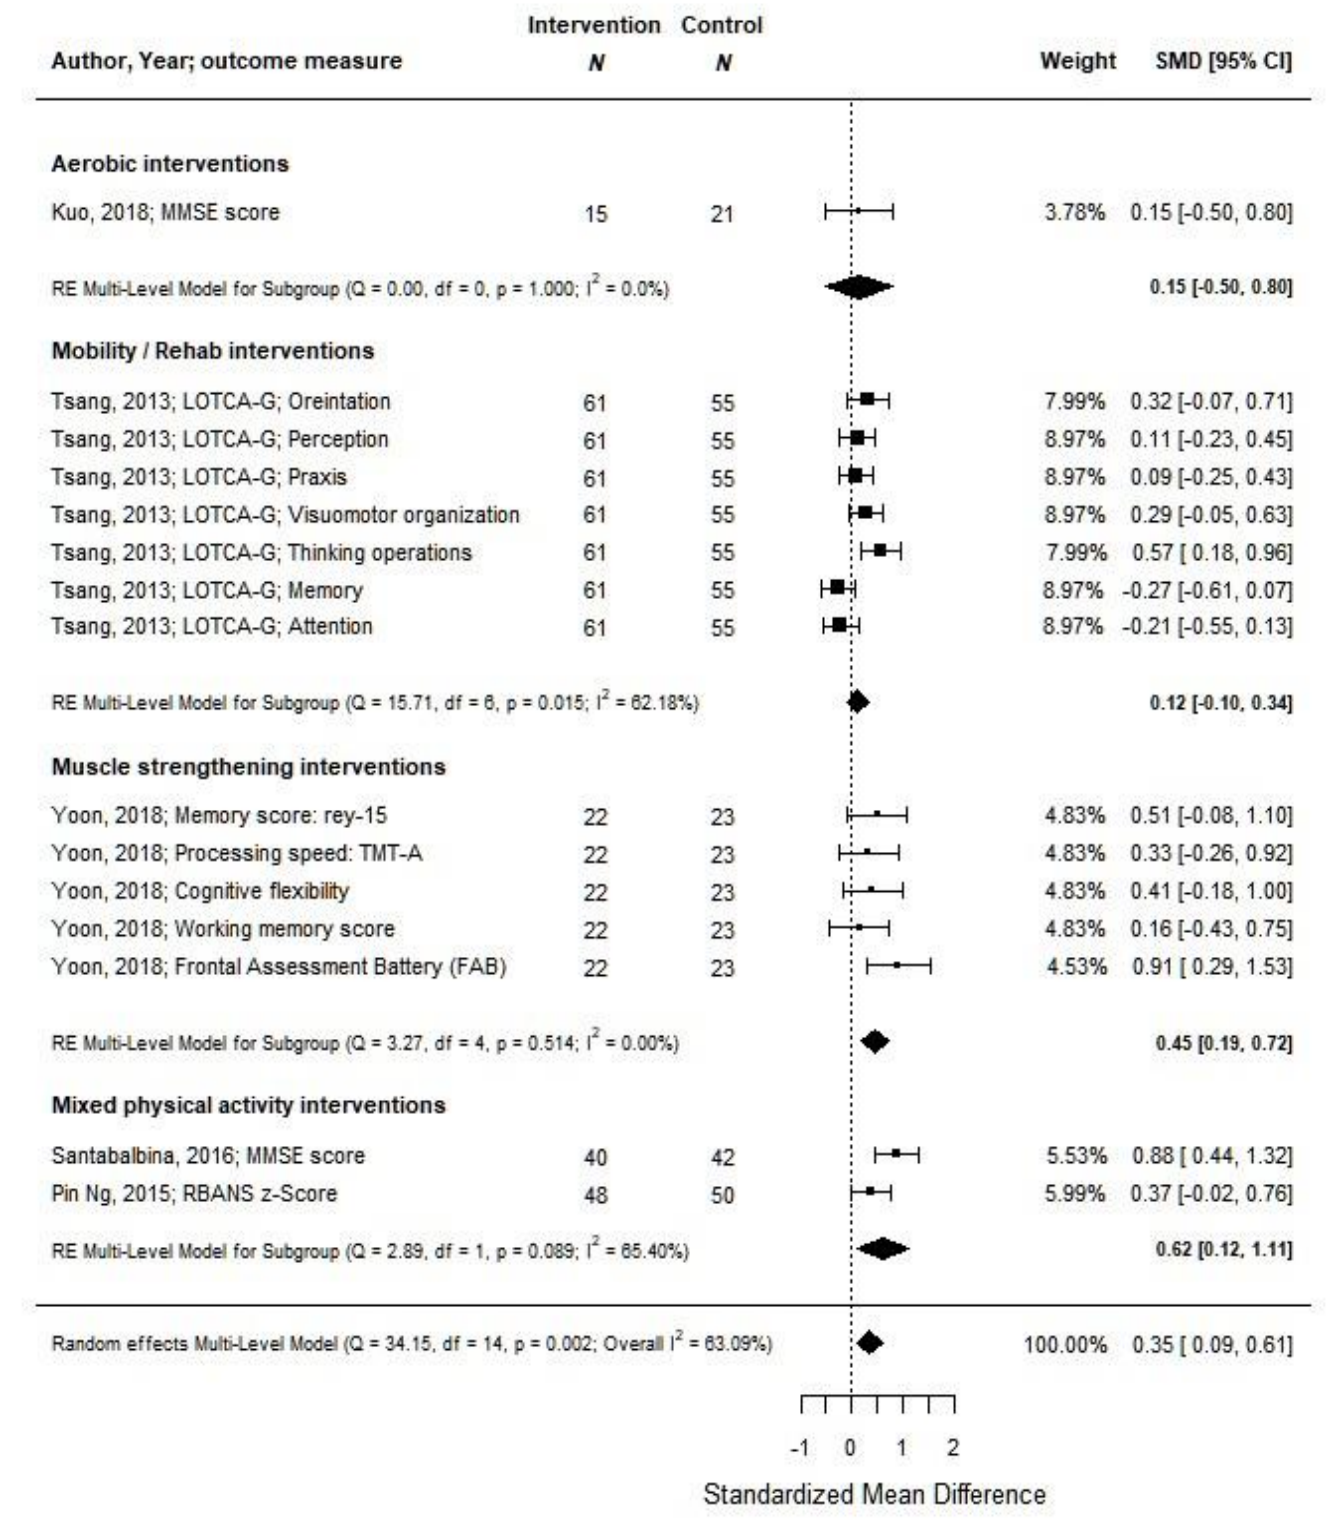

## Effect on Quality of life

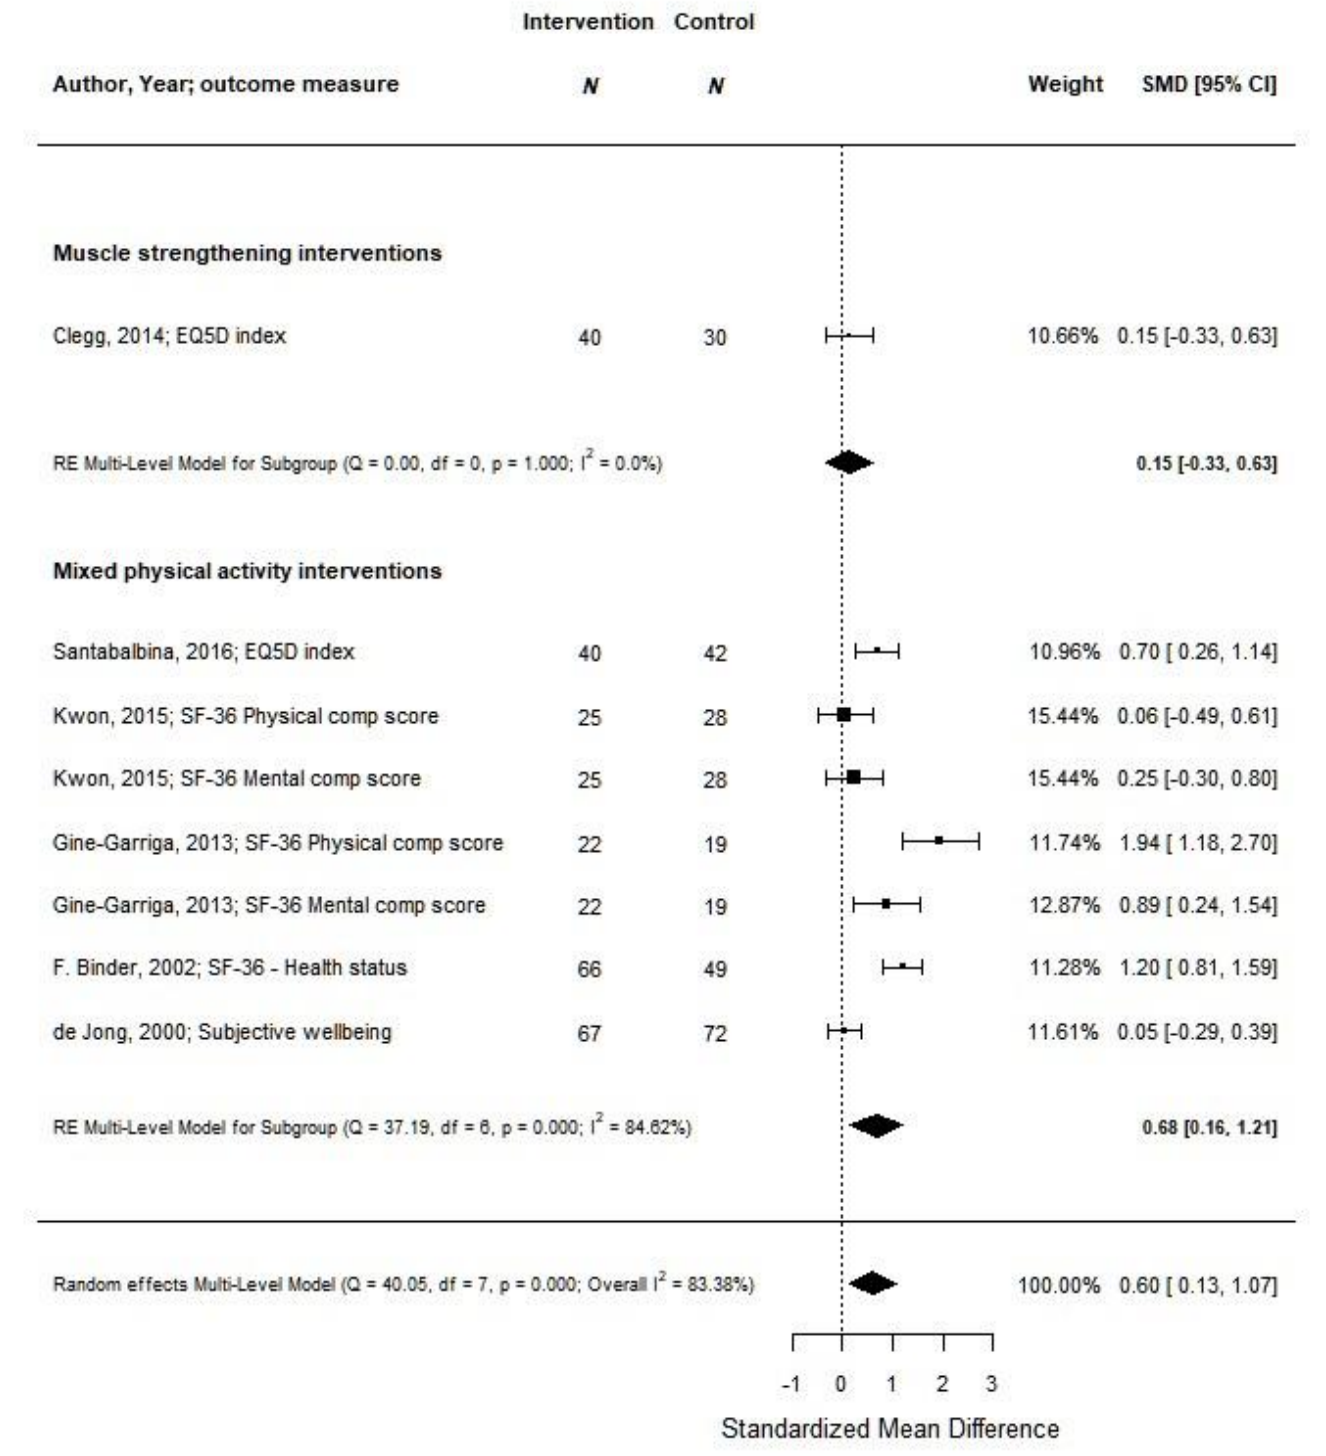

## Effect on Frailty (continuous)

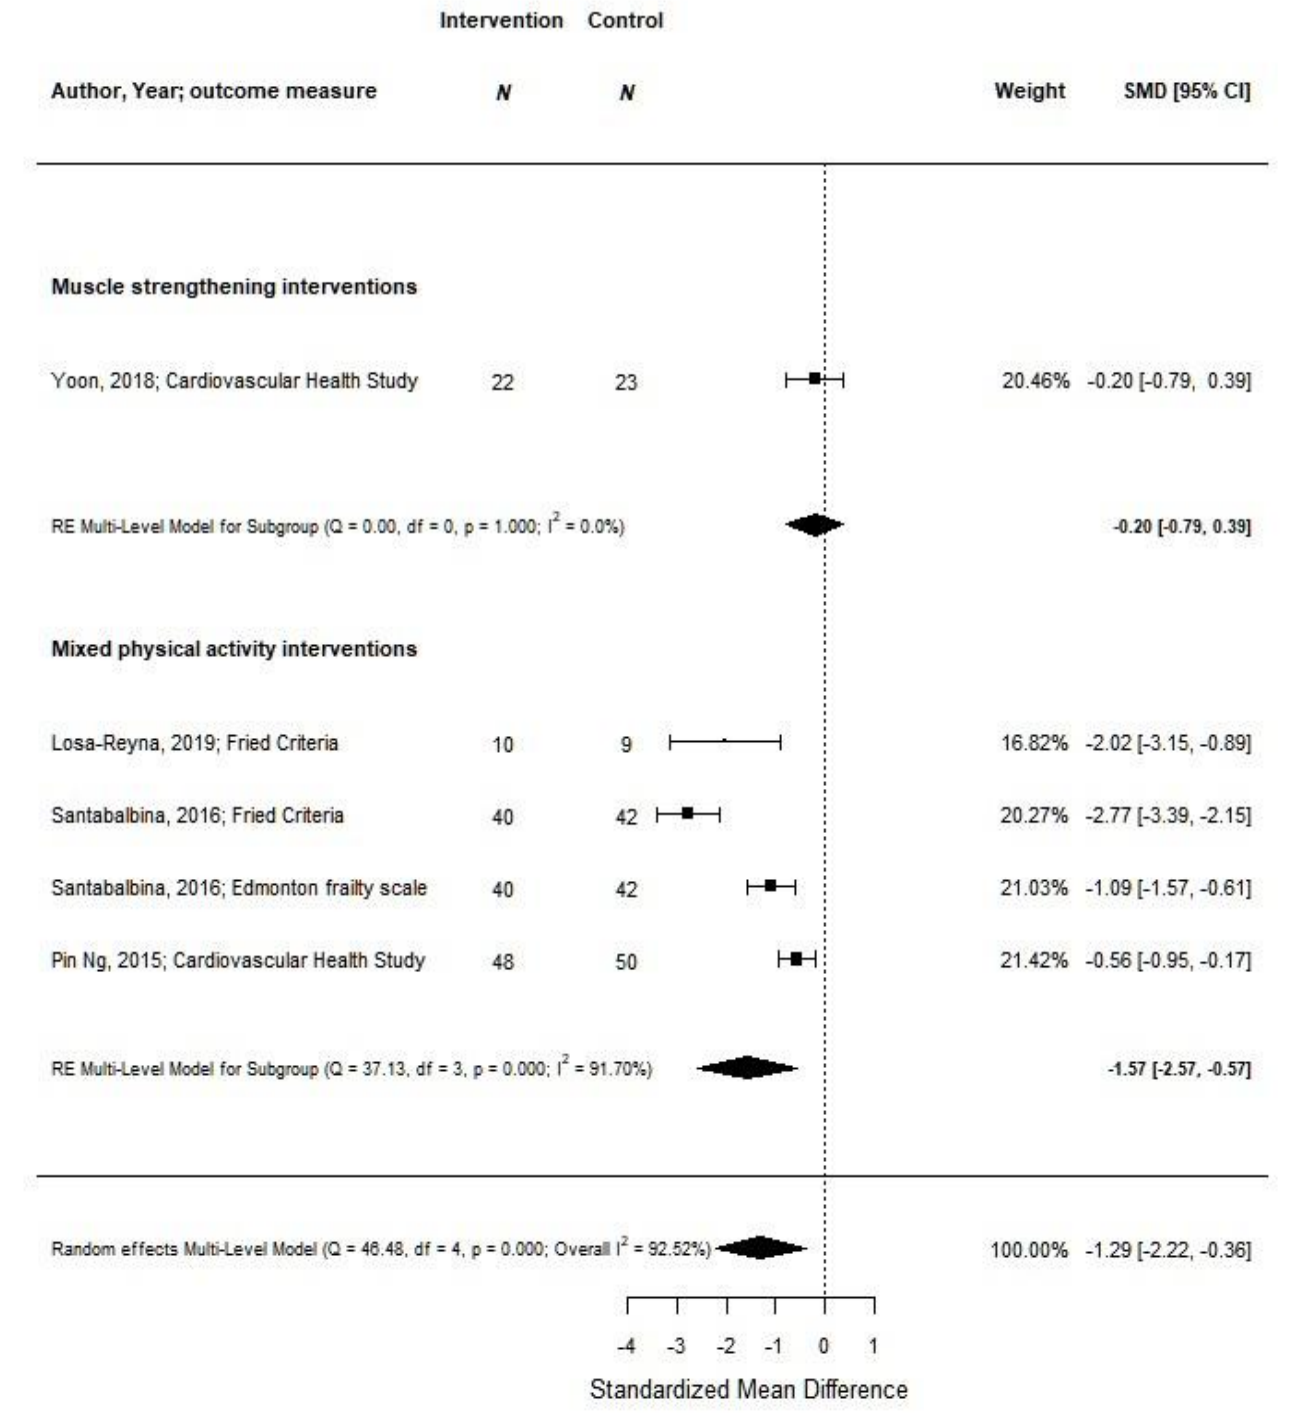

## Effect on Frailty prevalence (Binary: # Frail at post-intervention)

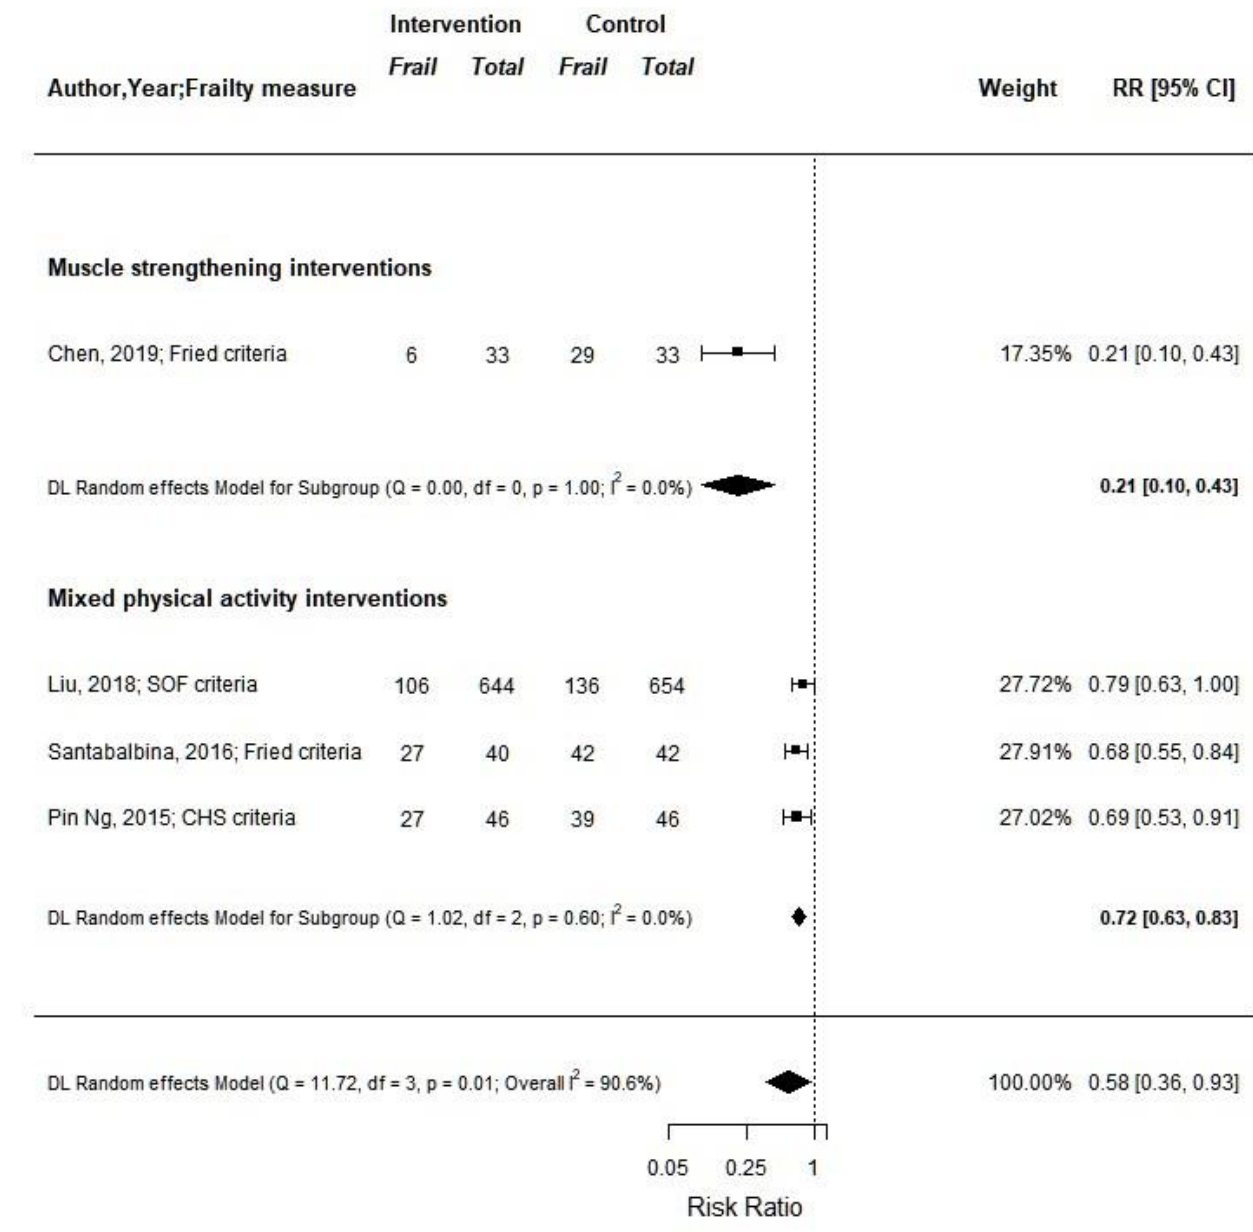

## Effect on Incidence of Falls (Binary: # Falls at post-intervention)

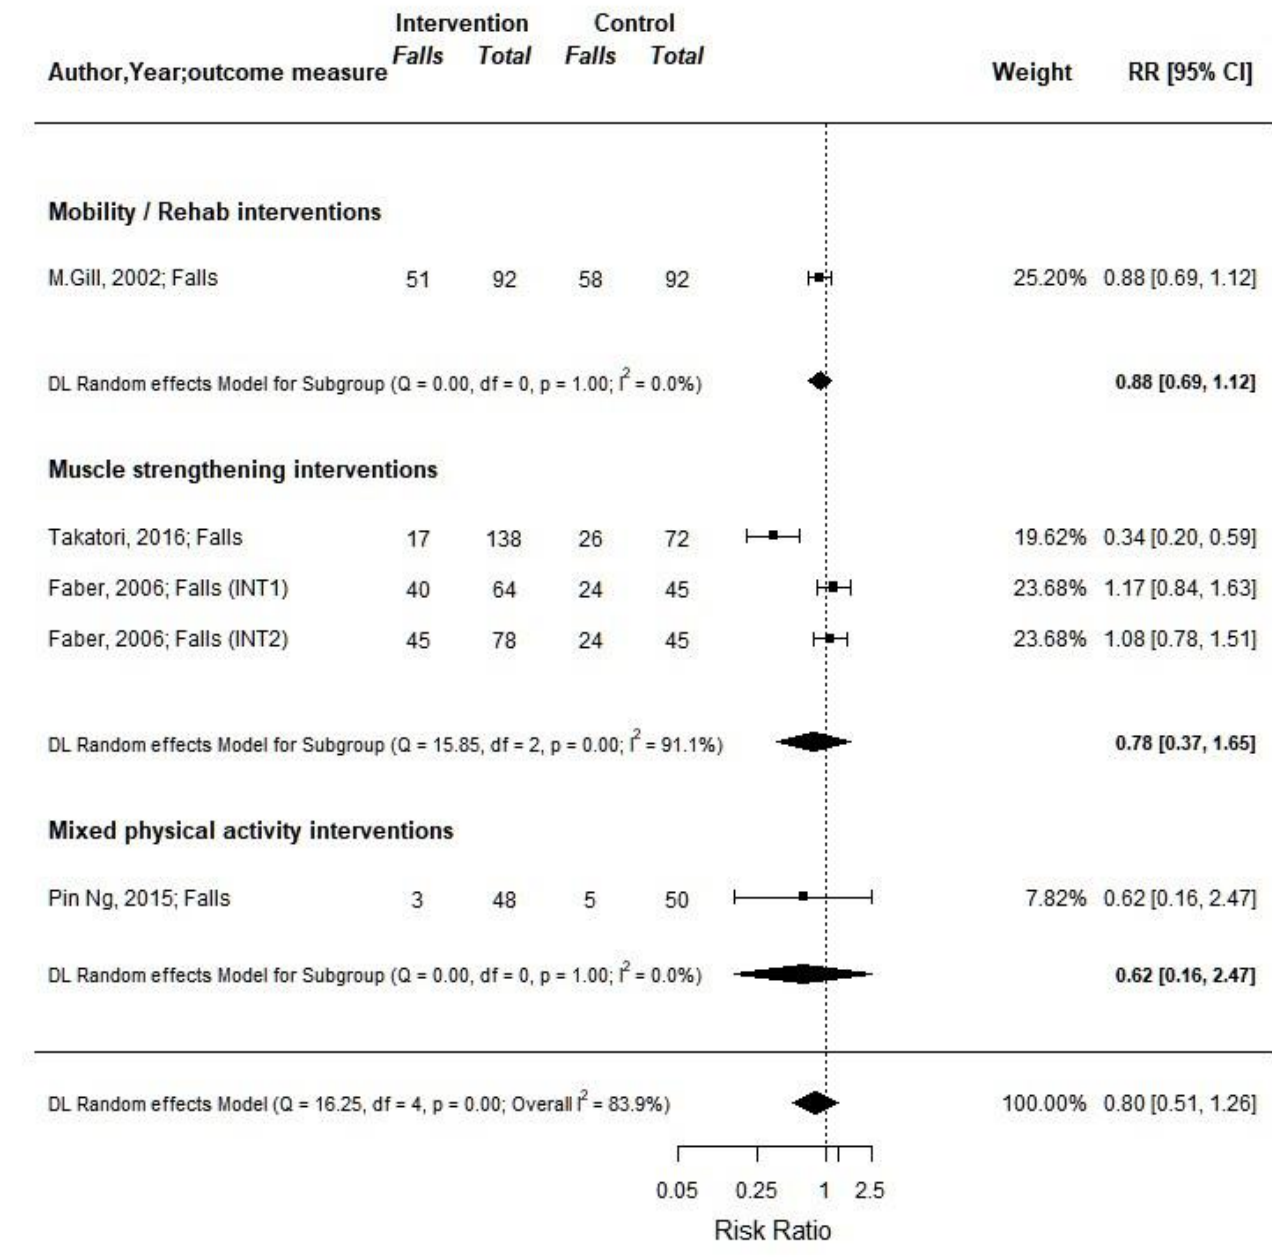

# Effect on mean number of falls (continuous)\*

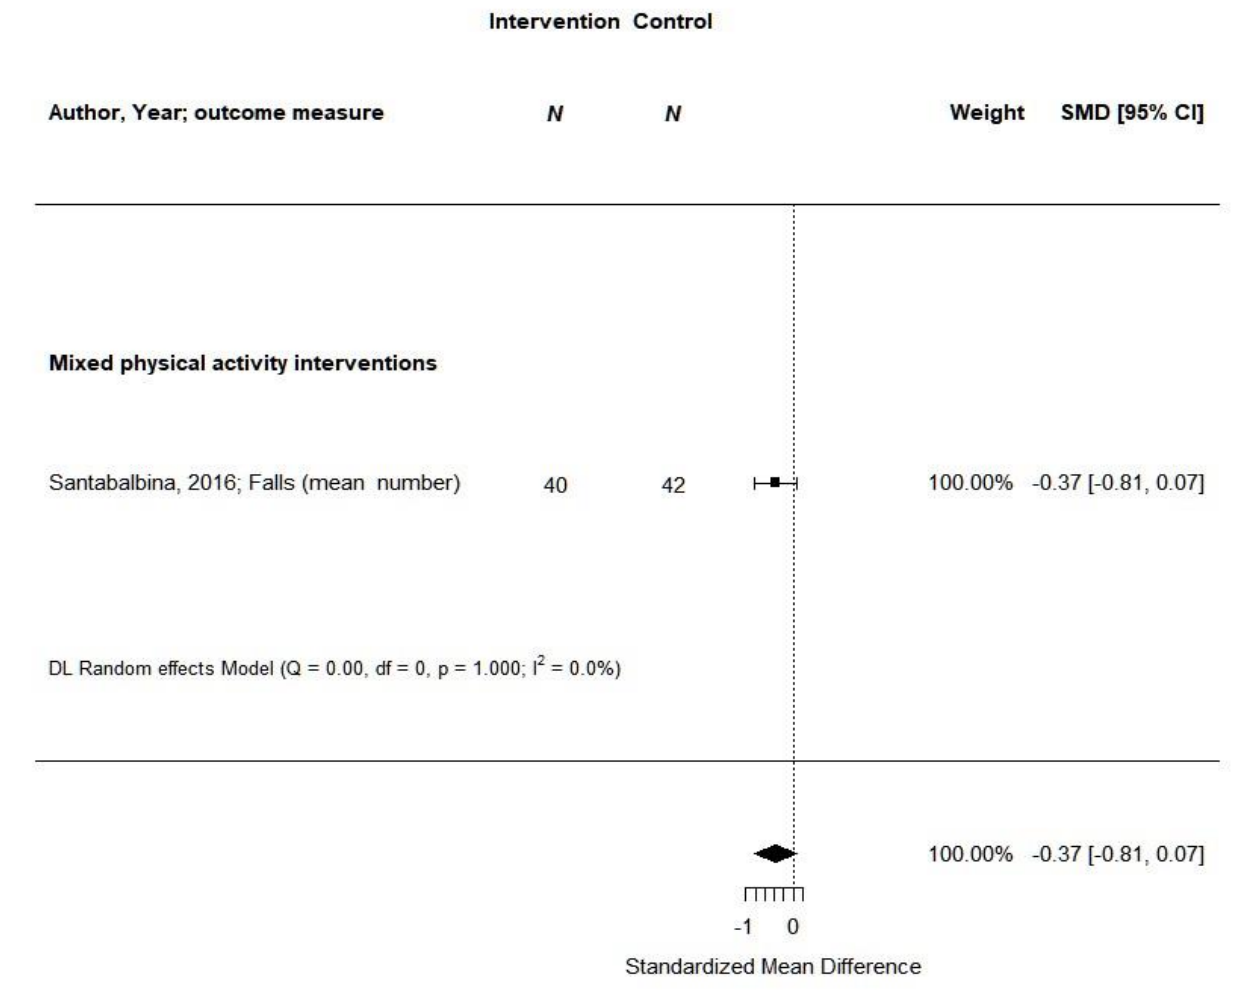

**\*Only 1 study that provided the data, forest plot only for display purpose**



## Effect on Fatigue level

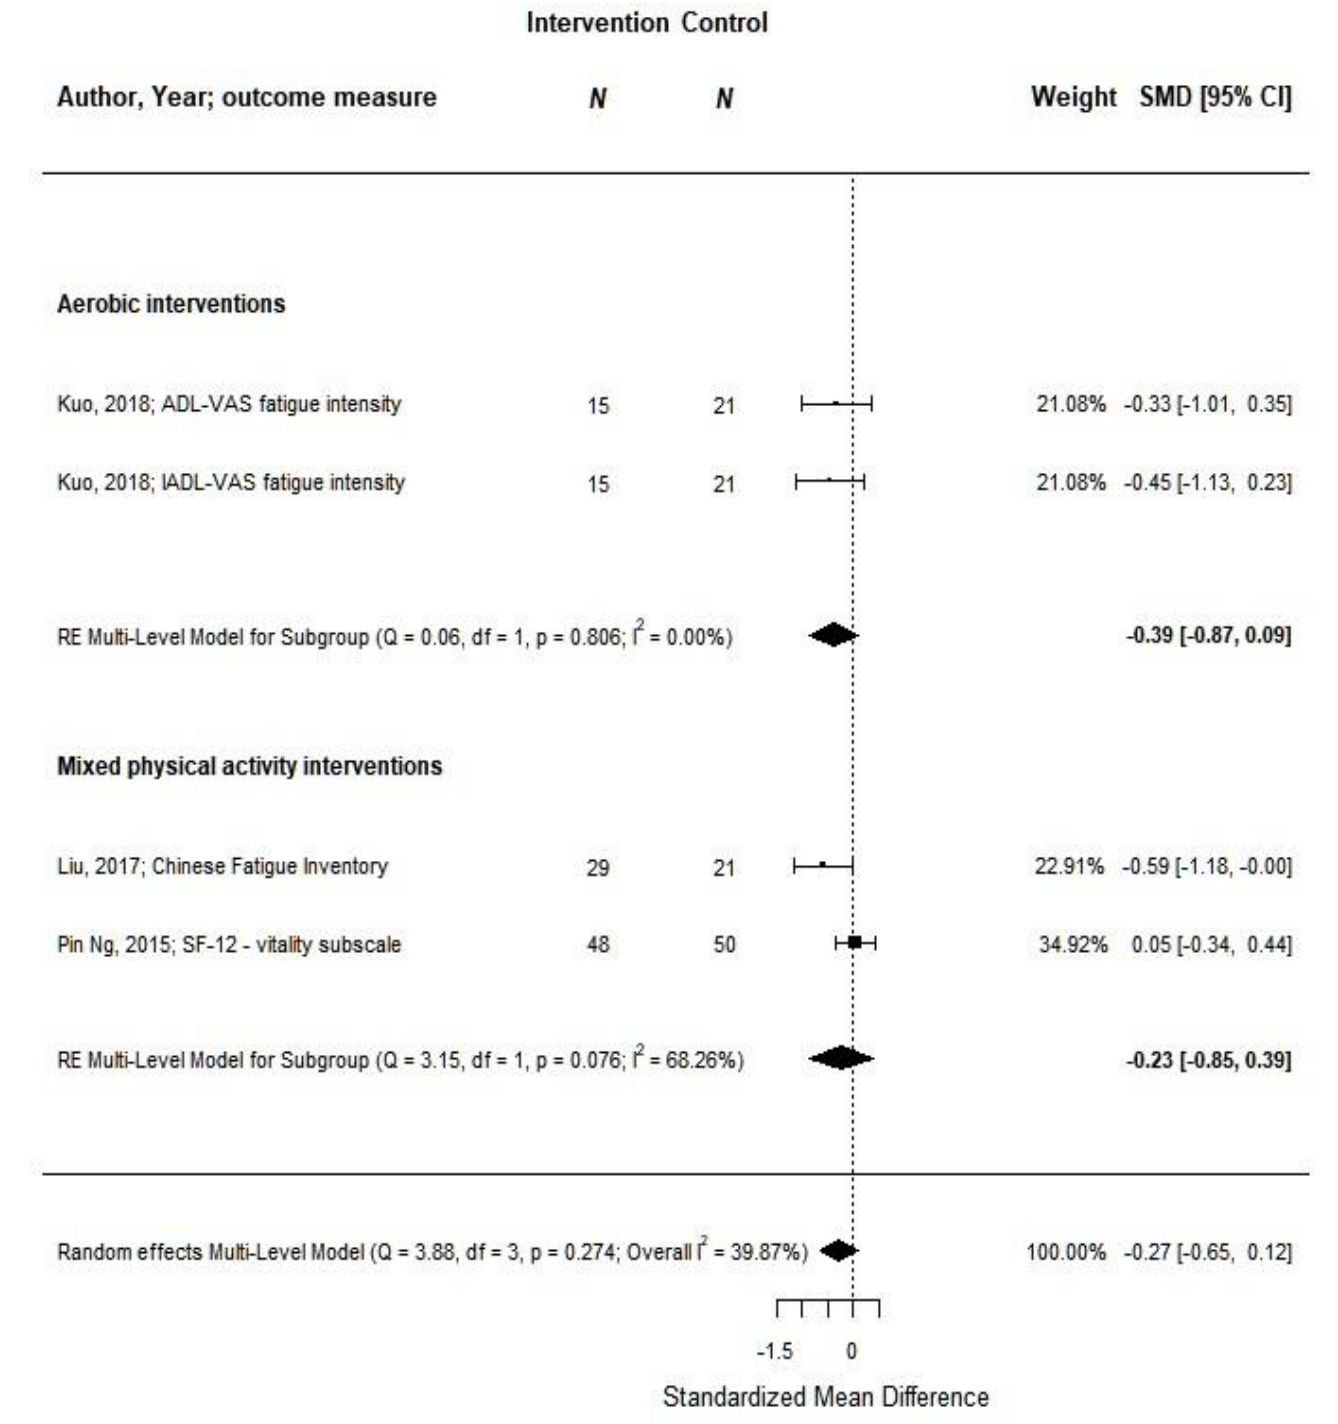

# Effect on Health services use (# of Emergency visits - continuous)\*

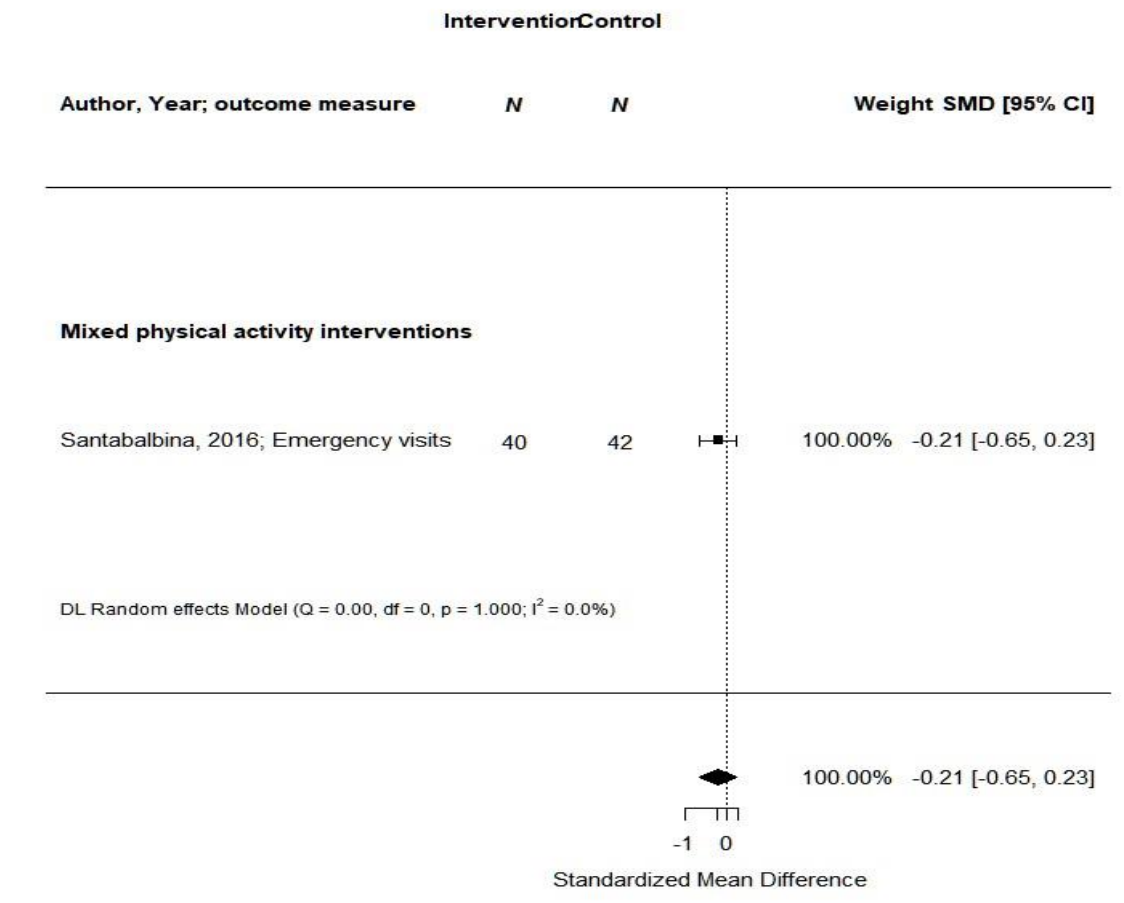

**\*Only 1 study that provided the data, forest plot only for display purpose**

## Effect on Health services use (Hospitalization - Binary)\*

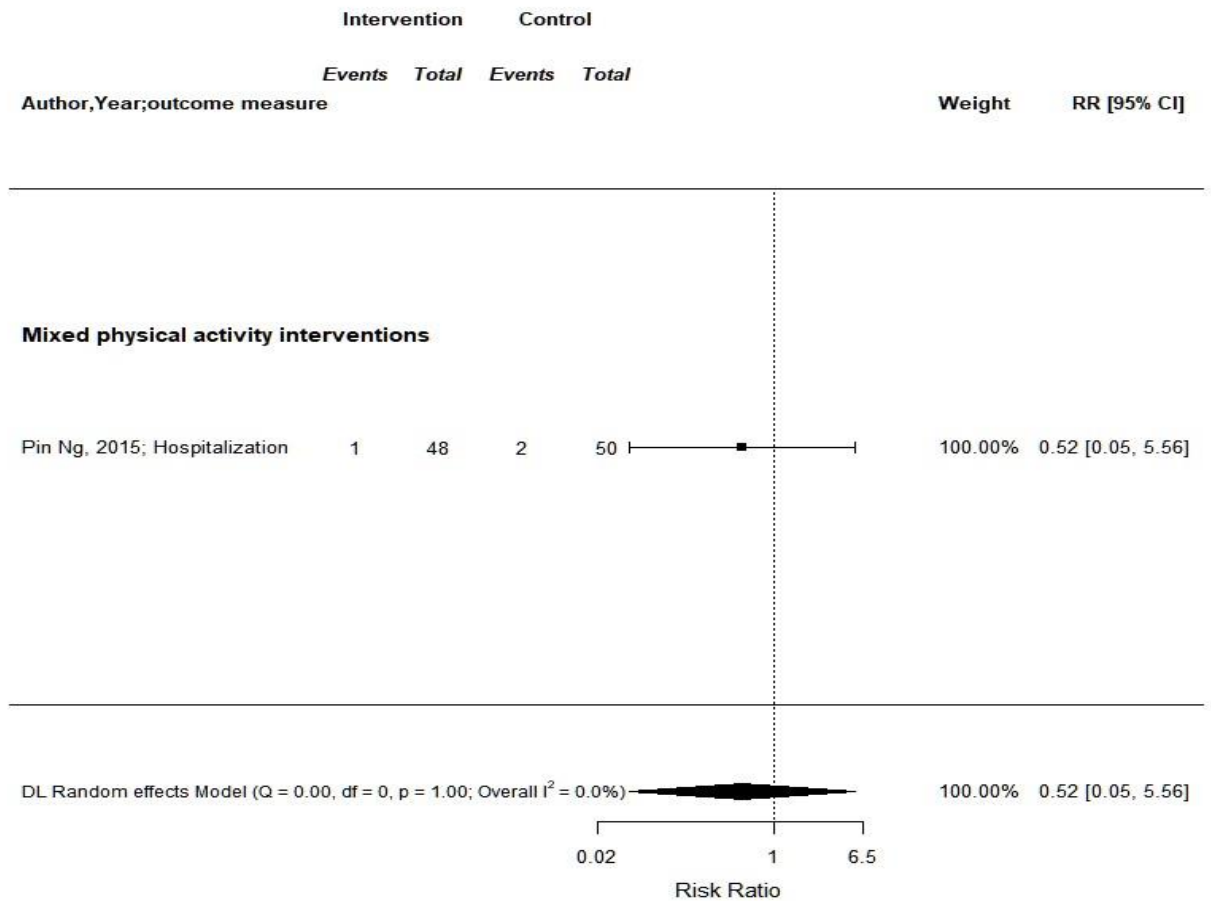

\*Only 1 study that provided the data, forest plot only for display purpose
